# Supplementary material for: What Impact has SARS-CoV-2/Covid-19 Pandemic on Healthcare Workers (HCWs) Mortality &amp; Infections across 36 states &amp; union territories of India? How to prevent mortality &amp; morbidity of HCWs?
Source: Research Square preprint supplement (doi:10.21203/rs.3.rs-538781/v1), 2021-05-19
Supplement: Supplementary file 1 [file 98ed3a7918ce417a0214f4c5.docx]

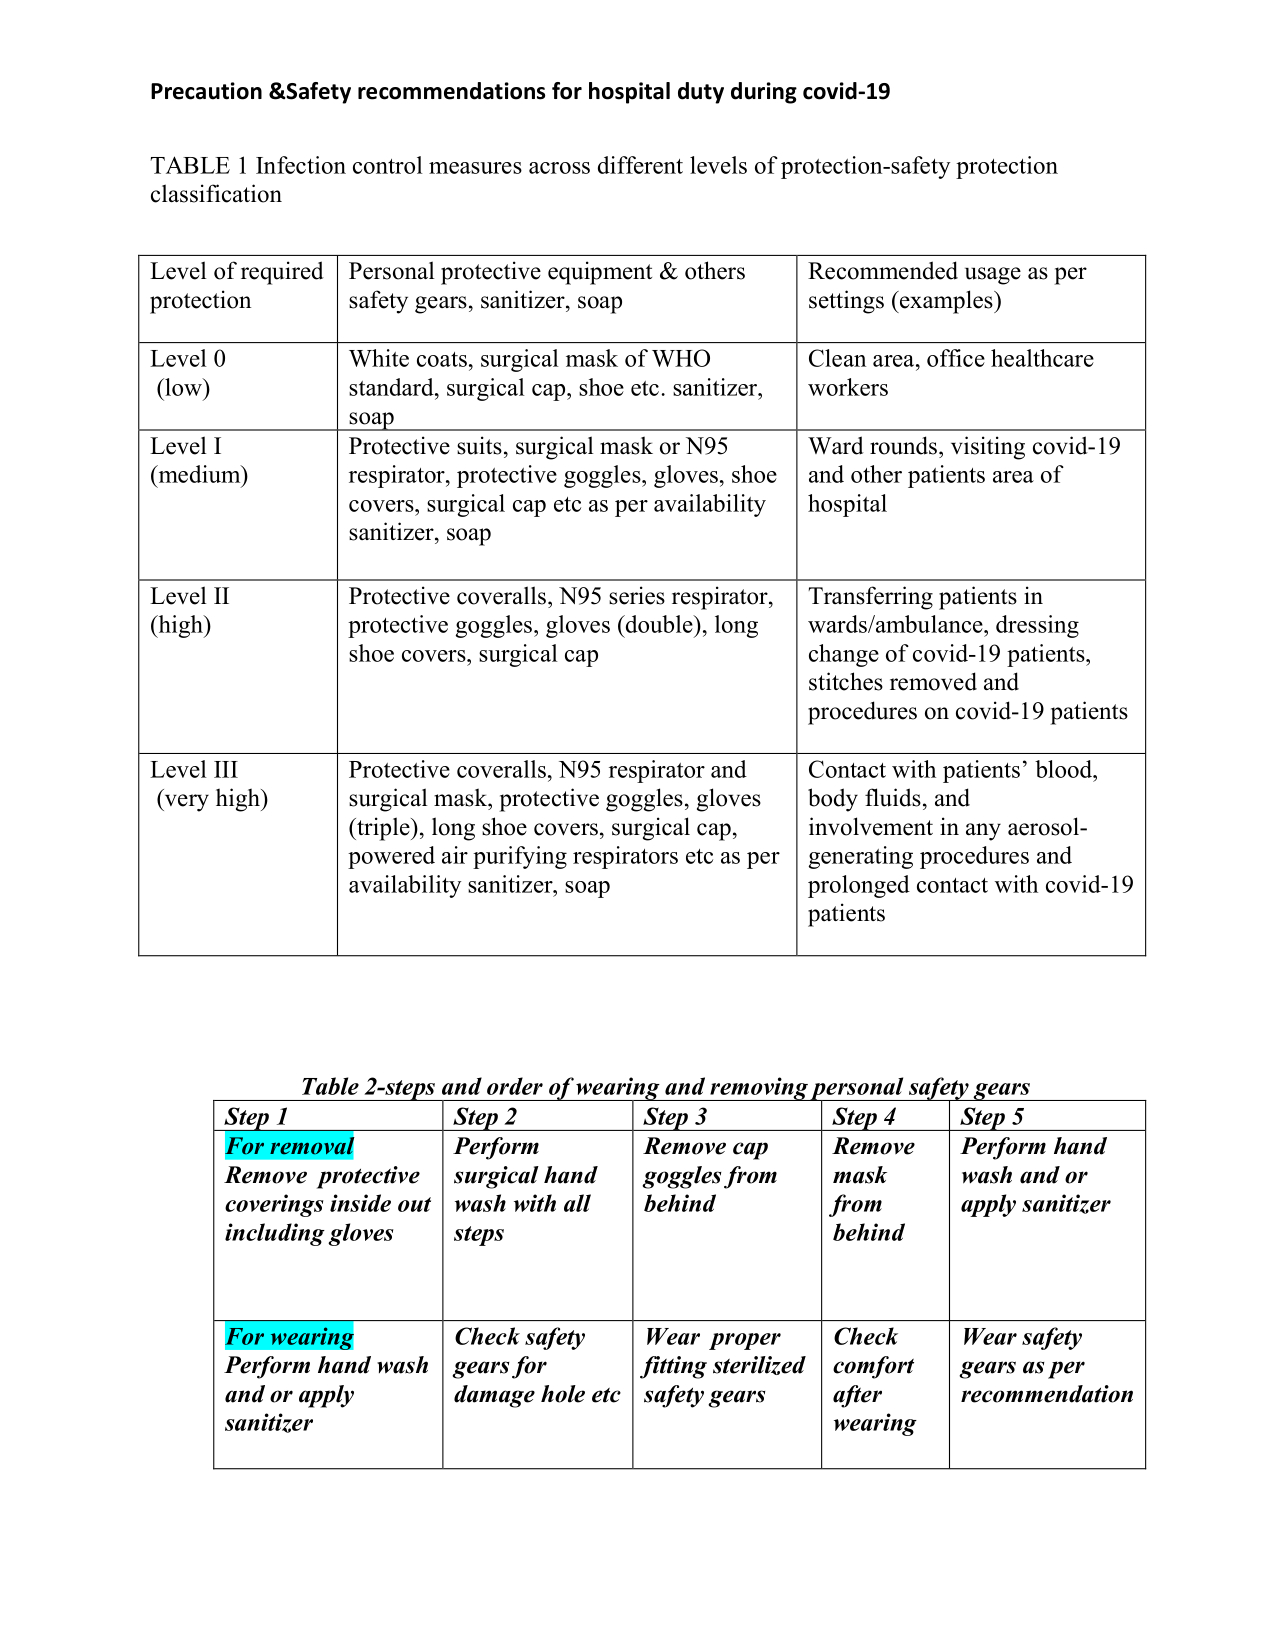


| **Table-4**  **No. of Health workers died due to COVID-19 as per PMGKP: Insurance Scheme** | | | | | | |
| --- | --- | --- | --- | --- | --- | --- |
| **State/UT wise List (As on 11-09-2020)-source-** [**https://pib.gov.in/PressReleasePage.aspx?PRID=1654454**](https://pib.gov.in/PressReleasePage.aspx?PRID=1654454) | | | | | | |
| **S. No.** | **State/UT** | **Doctors** | **ANM/MPHW** | **ASHA** | **Others** | **Total** |
| 1 | Andaman & Nicobar | 1 | 0 | 0 | 0 | 1 |
| 2 | Andhra Pradesh | 5 | 5 | 1 | 1 | 12 |
| 3 | Arunachal Pradesh | 0 | 0 | 0 | 0 | 0 |
| 4 | Assam | 1 | 0 | 0 | 4 | 5 |
| 5 | Bihar | 4 | 1 | 1 | 0 | 6 |
| 6 | Chandigarh | 0 | 0 | 0 | 0 | 0 |
| 7 | Chhattisgarh | 2 | 0 | 1 | 1 | 4 |
| 8 | Delhi | 3 | 0 | 0 | 5 | 8 |
| 9 | Gujarat | 5 | 6 | 2 | 1 | 14 |
| 10 | Haryana | 2 | 0 | 0 | 0 | 2 |
| 11 | Himachal Pradesh | 0 | 0 | 1 | 0 | 1 |
| 12 | Jammu & Kashmir | 2 | 0 | 0 | 1 | 3 |
| 13 | Jharkhand | 2 | 2 | 1 | 1 | 6 |
| 14 | Karnataka | 2 | 0 | 1 | 1 | 4 |
| 15 | Kerala | 0 | 0 | 0 | 1 | 1 |
| 16 | Madhya Pradesh | 3 | 0 | 0 | 4 | 7 |
| 17 | Maharashtra | 6 | 3 | 0 | 12 | 21 |
| 18 | Mizoram | 0 | 0 | 0 | 2 | 2 |
| 19 | Odisha | 3 | 1 | 0 | 1 | 5 |
| 20 | Punjab | 1 | 2 | 1 | 1 | 5 |
| 21 | Puducherry | 0 | 0 | 0 | 0 | 0 |
| 22 | Rajasthan | 2 | 5 | 0 | 1 | 8 |
| 23 | Tamil Nadu | 5 | 3 | 0 | 2 | 10 |
| 24 | Telangana | 3 | 0 | 3 | 1 | 7 |
| 25 | Uttar Pradesh | 8 | 0 | 0 | 1 | 9 |
| 26 | West Bengal | 4 | 4 | 2 | 4 | 14 |
|  | Total | 64 | 32 | 14 | 45 | 155 |

**Table-3 below**

**Source-** [**https://pqars.nic.in/annex/253/A85.pdf**](https://pqars.nic.in/annex/253/A85.pdf)

| No. of Healthcare Staff died due to COVID-19  (as on 22.01.2021) | | |
| --- | --- | --- |
| Doctors | Nurses | ASHA workers |
| 162 | 107 | 44 |

Healthcare workers death & infections due to covid-19 in 36 states and union territories of India

**Table-5**

| Healthcare workers death & infections due to covid-19 in 36 states and union territories of India-5/19/2021 10:41:50 AM  **India** | **Table-5**  **Medical Doctors** | | **Medical Nurses** | | **Other Medical Staff** | | **HCWs (total)** | | **Population** | **HCW**  **Mortality per 100,000** |
| --- | --- | --- | --- | --- | --- | --- | --- | --- | --- | --- |
| **State/UT** | **died** | **infected** | **died** | **infected** | **died** | **infected** | **died** | **infected** |  |  |
| **Andhra Pradesh** | **70+22** | **?** | **?** | **?** | **?** | **?** | **14** | **994** | **Census pending due to Covid-19** | **?** |
| **Arunachal Pradesh** | **2** | **?** | **?** | **?** | **?** | **?** | **?** | **?** | **Census pending due to Covid** | **?** |
| **Assam** | **20+02** | **?** | **?** | **?** | **?** | **?** | **03** | **1127** | **Census pending due to Covid** | **?** |
| **Bihar** | **40+78** | **?** | **?** | **?** | **?** | **?** | **04** | **940** | **Census pending due to Covid** | **?** |
| **Chhattisgarh** | **03** | **?** | **?** | **?** | **?** | **?** | **?** | **?** | **Census pending due to Covid** | **?** |
| **Goa** | **01** | **?** | **?** | **?** | **?** | **?** | **?** | **?** | **Census pending due to Covid** | **?** |
| **Gujarat** | **02+62** | **?** | **?** | **?** | **?** | **?** | **35** | **3177** | **Census pending due to Covid** | **?** |
| **Haryana** | **02** | **?** | **?** | **?** | **?** | **?** | **09** | **2434** | **Census pending due to Covid** | **?** |
| **Himachal Pradesh** | **0** | **?** | **?** | **?** | **?** | **?** | **?** | **?** | **Census pending due to Covid** | **?** |
| **Jharkhand** | **0−5** | **?** | **?** | **?** | **?** | **?** | **02** | **1275** | **Census pending due to Covid** | **?** |
| **Karnataka** | **08+68** | **?** | **?** | **?** | **?** | **?** | **46** | **12260** | **Census pending due to Covid** | **?** |
| **Kerala** | **02** | **?** | **?** | **?** | **?** | **?** | **?** | **?** | **Census pending due to Covid** | **?** |
| **Madhya Pradesh** | **05+22** | **?** | **?** | **?** | **?** | **?** | **17** | **2029** | **Census pending due to Covid** | **?** |
| **Maharashtra** | **13+74** | **5913** | **10** | **4217** | **120** | **7845** | **292** | **24484** | **Census pending due to Covid** | **?** |
| **Manipur** | **?** | **?** | **?** | **?** | **?** | **?** | **?** | **?** | **Census pending due to Covid** | **?** |
| **Meghalaya** | **?** | **?** | **?** | **?** | **?** | **?** | **?** | **?** | **Census pending due to Covid** | **?** |
| **Mizoram** | **?** | **?** | **?** | **?** | **?** | **?** | **?** | **?** | **Census pending due to Covid** | **?** |
| **Nagaland** | **4** | **?** | **?** | **?** | **?** | **?** | **?** | **?** | **Census pending due to Covid** | **?** |
| **Odisha** | **08** | **?** | **?** | **?** | **?** | **?** | **02** | **2185** | **Census pending due to Covid** | **?** |
| **Punjab** | **20** | **?** | **?** | **?** | **?** | **?** | **02** | **1055** | **Census pending due to Covid** | **?** |
| **Rajasthan** | **0** | **?** | **?** | **?** | **?** | **?** | **11** | **2398** | **Census pending due to Covid** | **?** |
| **Sikkim** | **?** | **?** | **?** | **?** | **?** | **?** | **?** | **?** | **Census pending due to Covid** | **?** |
| **Tamil nadu** | **10+89** | **?** | **?** | **?** | **?** | **?** | **49** | **11169** | **Census pending due to Covid** | **?** |
| **Telangana** | **19** | **?** | **?** | **?** | **?** | **?** | **01** | **2704** | **Census pending due to Covid** | **?** |
| **Tripura** | **?** | **?** | **?** | **?** | **?** | **?** | **?** | **?** | **Census pending due to Covid** | **?** |
| **Uttar Pradesh** | **66+37** | **?** | **?** | **?** | **?** | **?** | **06** | **1650** | **Census pending due to Covid** | **?** |
| **Uttarakhand** | **?** | **?** | **?** | **?** | **?** | **?** | **?** | **?** | **Census pending due to Covid** | **?** |
| **West Bengal** | **80+** | **?** | **?** | **?** | **?** | **?** | **21** | **5126** | **Census pending due to Covid** | **?** |
| **A & N islands** | **?** | **?** | **?** | **?** | **?** | **?** | **?** | **?** | **Census pending due to Covid** | **?** |
| **Chandigarh** | **?** | **?** | **?** | **?** | **?** | **?** | **?** | **?** | **Census pending due to Covid** | **?** |
| **Dadar nagar haveli** | **?** | **?** | **?** | **?** | **?** | **?** | **?** | **?** | **Census pending due to Covid** | **?** |
| **Delhi** | **22+29** | **?** | **?** | **?** | **?** | **?** | **51** | **8363** | **Census pending due to Covid** | **?** |
| **Jammu & Kashmir** | **03** | **?** | **?** | **?** | **?** | **?** | **?** | **?** | **Census pending due to Covid** | **?** |
| **Lakshadweep** | **?** | **?** | **?** | **?** | **?** | **?** | **?** | **?** | **Census pending due to Covid** | **?** |
| **Puducherry** | **?** | **?** | **?** | **?** | **?** | **?** | **?** | **?** | **Census pending due to Covid** | **?** |
| **Laddakh** | **?** | **?** | **?** | **?** | **?** | **?** | **?** | **?** | **Census pending due to Covid** | **?** |
|  | **?** | **?** | **?** | **?** | **?** | **?** | **?** | **87176** |  | **?** |
| **All India[[1]](#endnote-1)** | **108** | **1073** | **02** | **144** | **?** | **96** | **110** | **1313** | **Census pending due to Covid-19** | **?** |
| **748+270= 1st wave+2nd wave doctors-IMA ?**  Healthcare workers death & infections due to covid-19 in 36 states and union territories of India | | | | | | | | | | |
| Note: It’s a fact well known worldwide that due to several reasons real data of mortality and morbidity is not available till date. The data sources are mentioned below from where it is collected.  References  <https://www.thehindu.com/news/national/covid-19-surge-bihar-up-delhi-top-list-of-deaths-among-doctors-in-second-wave-says-ima/article34577689.ece>  <https://timesofindia.indiatimes.com/india/over-87k-health-workers-infected-with-covid-19-573-dead/articleshow/77814189.cms>  <https://www.indiatoday.in/coronavirus-outbreak/story/in-second-wave-india-lost-269-doctors-to-covid-1803828-2021-05-18>  <https://indianexpress.com/article/cities/pune/747-doctors-died-of-covid-19-in-india-ima-7277087>  <https://indianexpress.com/article/cities/pune/747-doctors-died-of-covid-19-in-india-ima-7277087>  <https://www.hindustantimes.com/india-news/270-doctors-have-dies-in-second-wave-of-covid-19-says-ima-101621321701122.html>  <https://doi.org/10.1016/J.IJID.2020.10.064> | | | | | | | | | | |

1. <https://doi.org/10.1016/J.IJID.2020.10.064> [↑](#endnote-ref-1)
